# Supplementary material for: Neoadjuvant Efficacy of Three Targeted Therapy Strategies for HER2-Positive Breast Cancer Based on the Same Chemotherapy Regimen
Source: MDPI journal article supplement (doi:10.3390/cancers14184508), 2022-09-17
Supplement: s1 [file s1]

Table S1 Univariate analyses of factors associated with pCR in subgroup by HR status

| Variables         |                 | HR negative |          |           |        | HR positive |           |           |        |
|-------------------|-----------------|-------------|----------|-----------|--------|-------------|-----------|-----------|--------|
|                   |                 | N           | Non-pCR  | pCR       | P      | N           | Non-pCR   | pCR       | P      |
| Age (years)       | <50             | 104         | 53(51.0) | 51(49.0)  | 0.065  | 198         | 126(63.6) | 72(36.4)  | 0.832  |
|                   | ≥50             | 107         | 41(38.3) | 66(61.7)  |        | 136         | 85(62.5)  | 51(37.5)  |        |
| Menopausal status | Premenopausal   | 115         | 55(47.8) | 60(52.2)  | 0.295  | 200         | 130(65.0) | 70(35.0)  | 0.398  |
|                   | Postmenopausal  | 96          | 39(40.6) | 57(59.4)  |        | 134         | 81(60.4)  | 53(39.6)  |        |
| T                 | T1              | 19          | 8(42.1)  | 11(57.9)  | 0.098  | 19          | 9(47.4)   | 10(52.6)  | 0.161  |
|                   | T2              | 154         | 62(40.3) | 92(59.7)  |        | 261         | 162(62.1) | 99(37.9)  |        |
|                   | T3              | 29          | 18(62.1) | 11(37.9)  |        | 35          | 27(77.1)  | 8(22.9)   |        |
|                   | T4              | 9           | 6(66.7)  | 3(33.3)   |        | 19          | 13(68.4)  | 6(31.6)   |        |
|                   | N0              | 40          | 14(35.0) | 26(65.0)  |        | 75          | 38(50.7)  | 37(49.3)  |        |
| N                 | N1              | 101         | 45(44.6) | 56(55.4)  | 0.469  | 147         | 100(68.0) | 47(32.0)  | 0.051  |
|                   | N2              | 26          | 14(53.8) | 12(46.2)  |        | 51          | 36(70.6)  | 15(29.4)  |        |
|                   | N3              | 44          | 21(47.7) | 23(52.3)  |        | 61          | 37(60.7)  | 24(39.3)  |        |
| HER2 status       | IHC 2+          | 25          | 16(64.0) | 9(36.0)   | 0.042  | 83          | 72(86.7)  | 11(13.3)  | <0.001 |
|                   | IHC 3+          | 186         | 78(41.9) | 108(58.1) |        | 251         | 139(55.4) | 112(44.6) |        |
| Ki-67             | Low expression  | 40          | 26(65.0) | 14(35.0)  | 0.005  | 77          | 51(66.2)  | 26(33.8)  | 0.526  |
|                   | High expression | 171         | 68(39.8) | 103(60.2) |        | 257         | 160(62.3) | 97(37.7)  |        |
| Regimen           | TCH + Py        | 20          | 3(15.0)  | 17(85.0)  | <0.001 | 43          | 25(58.1)  | 18(41.9)  | 0.007  |
|                   | TCH             | 111         | 68(61.3) | 43(38.7)  |        | 173         | 123(71.1) | 50(28.9)  |        |
|                   | TCHP            | 80          | 23(28.8) | 57(71.3)  |        | 118         | 63(53.4)  | 55(46.6)  |        |

pCR, pathological complete response; HR, hormone receptor; T, tumor; N, node; HER2, human epidermal growth factor receptor 2; IHC, immunohistochemistry; TCH + Py, docetaxel, carboplatin, trastuzumab and pyrotinib; TCH, docetaxel, carboplatin and trastuzumab; TCHP, docetaxel, carboplatin, trastuzumab and pertuzumab.

Table S2 Univariate analyses of factors associated with pCR in subgroup by HER2 status

| Variables         |                 | HER2 IHC 2+ |          |          |       | HER2 IHC 3+ |           |           |        |
|-------------------|-----------------|-------------|----------|----------|-------|-------------|-----------|-----------|--------|
|                   |                 | N           | Non-pCR  | pCR      | P     | N           | Non-pCR   | pCR       | P      |
| Age (years)       | <50             | 58          | 48(82.8) | 10(17.2) | 0.713 | 244         | 131(53.7) | 113(46.3) | 0.058  |
|                   | ≥50             | 50          | 40(80.0) | 10(20.0) |       | 193         | 86(44.6)  | 107(55.4) |        |
| Menopausal status | Premenopausal   | 59          | 48(81.4) | 11(18.6) | 0.971 | 256         | 137(53.5) | 119(46.5) | 0.055  |
|                   | Postmenopausal  | 49          | 40(81.6) | 9(18.4)  |       | 181         | 80(44.2)  | 101(55.8) |        |
| T                 | T1              | 6           | 4(66.7)  | 2(33.3)  | 0.550 | 32          | 13(40.6)  | 19(59.4)  | 0.034  |
|                   | T2              | 84          | 68(81.0) | 16(19.0) |       | 331         | 156(47.1) | 175(52.9) |        |
|                   | T3              | 13          | 11(84.6) | 2(15.4)  |       | 51          | 34(66.7)  | 17(33.3)  |        |
|                   | T4              | 5           | 5(100)   | 0        |       | 23          | 14(60.9)  | 9(39.1)   |        |
|                   | N0              | 20          | 12(60.0) | 8(40.0)  |       | 95          | 40(42.1)  | 55(57.9)  |        |
| N                 | N1              | 48          | 41(85.4) | 7(14.6)  | 0.076 | 200         | 104(52.0) | 96(48.0)  | 0.125  |
|                   | N2              | 15          | 13(86.7) | 2(13.3)  |       | 62          | 37(59.7)  | 25(40.3)  |        |
|                   | N3              | 25          | 22(88.0) | 3(12.0)  |       | 80          | 36(45.0)  | 44(55.0)  |        |
| HR status         | Negative        | 25          | 16(64.0) | 9(36.0)  | 0.014 | 186         | 78(41.9)  | 108(58.1) | 0.006  |
|                   | Positive        | 83          | 72(86.7) | 11(13.3) |       | 251         | 139(55.4) | 112(44.6) |        |
| Ki-67             | Low expression  | 27          | 23(85.2) | 4(14.8)  | 0.569 | 90          | 54(60.0)  | 36(40.0)  | 0.029  |
|                   | High expression | 81          | 65(80.2) | 16(19.8) |       | 347         | 163(47.0) | 184(53.0) |        |
| Regimen           | TCH + Py        | 12          | 8(66.7)  | 4(33.3)  | 0.024 | 51          | 20(39.2)  | 31(60.8)  | <0.001 |
|                   | TCH             | 53          | 49(92.5) | 4(7.5)   |       | 231         | 142(61.5) | 89(38.5)  |        |
|                   | TCHP            | 43          | 31(72.1) | 12(27.9) |       | 155         | 55(35.5)  | 100(64.5) |        |

pCR, pathological complete response; HER2, human epidermal growth factor receptor 2; IHC, immunohistochemistry; T, tumor; N, node; HR, hormone receptor; TCH + Py, docetaxel, carboplatin, trastuzumab and pyrotinib; TCH, docetaxel, carboplatin and trastuzumab; TCHP, docetaxel, carboplatin, trastuzumab and pertuzumab.
